# Supplementary material for: Translation and pilot study of the Cleft Hearing Appearance and Speech Questionnaire (CHASQ)
Source: Springer Nature journal article supplement (doi:10.1007/s00238-019-01543-9), 2019-06-07
Supplement: MOESM1 [file 16781004]

**Как ви се струват следните части от лицето ви:**

**5. Нос**

много добре ☺            ☹ много зле

10 0

**6. Устни**

много добре ☺            ☹ много зле

10 0

**7. Брадичка**

много добре ☺            ☹ много зле

10 0

**8. Зъби**

много добре ☺            ☹ много зле

10 0

**9. Бузи**

много добре ☺            ☹ много зле

10 0

**10. Коса**

много добре ☺            ☹ много зле

10 0

**11. Уши**

много добре ☺            ☹ много зле

10 0

**12. Очи**

много добре ☺            ☹ много зле

10 0

**13. Как оценявате вашия говор**

Много добър            ☹ Много лош

☺ 10 0

**14. Как оценявате вашия слух**

☺            ☹

Много добър 10 0

**15. Колко забележима е като цяло според вас цепнатината ви за другите хора**

☺            ☹

10 0

Незабележима Много забележима
