# Supplementary material for: Translation and pilot study of the Cleft Hearing Appearance and Speech Questionnaire (CHASQ)
Source: Springer Nature journal article supplement (doi:10.1007/s00238-019-01543-9), 2019-06-07
Supplement: MOESM2 [file 16781004]

| Patsiendi nimi | Sünniaeg | Täitmise kuupäev |
|----------------|----------|------------------|
|                |          |                  |

MÕNED NOORED ÜTLEVAD, ET NAD ON RAHUL OMA KUULMISE,  
VÄLIMUSE JA KÕNEGA, TEISED AGA EI OLE.

KUIDAS SULLE TUNDUB?

SIIN EI OLE ÕIGEID EGA VALESID VASTUSEID.  
PALUN MÄRGI IGA KÜSIMUSE JUURES RIST VASTAVASSE KASTI.

**Palun hinda oma rahulolu:**

**1. näo välimusega:**

Väga rahul ☺            ☹ Ei ole üldse rahul

10 0

**2. välimusega üldiselt:**

Väga rahul ☺            ☹ Ei ole üldse rahul

10 0

**3. profiiliga (külgvaatega):**

Väga rahul ☺            ☹ Ei ole üldse rahul

10 0

**4. Kui hea Sa enda arvates välja näed?**

Väga kena ☺            ☹ Ei ole üldse kena

10 0

**Palun hinda oma rahulolu:**

**5. Ninaga:**

Väga rahul ☺            ☹ Ei ole üldse rahul

10 0

**6. Huultega:**

Väga rahul ☺            ☹ Ei ole üldse rahul

10 0

**7. Lõuaga:**

Väga rahul ☺            ☹ Ei ole üldse rahul

10 0

**8. Hammastega:**

Väga rahul ☺            ☹ Ei ole üldse rahul

10 0

**9. Põskedega:**

Väga rahul ☺            ☹ Ei ole üldse rahul

10 0

**10. Juustega:**

Väga rahul ☺            ☹ Ei ole üldse rahul

10 0

**11. Kõrvadega:**

Väga rahul ☺            ☹ Ei ole üldse rahul

10 0

**12. Silmadega:**

Väga rahul ☺            ☹ Ei ole üldse rahul

10 0

**13. Kui rahul oled Sa oma kõnega?**

Väga rahul ☺            ☹ Ei ole üldse rahul

10 0

**14. Kui rahul oled Sa oma kuulmisega?**

Väga rahul ☺            ☹ Ei ole üldse rahul

10 0

**15. Mis Sa arvad, kui märgatav on Sinu lõhe teistele inimestele?**

Ei märgata üldse ☺            ☹ Väga märgatav

10 0
