# Supplementary material for: Translation and pilot study of the Cleft Hearing Appearance and Speech Questionnaire (CHASQ)
Source: Springer Nature journal article supplement (doi:10.1007/s00238-019-01543-9), 2019-06-07
Supplement: MOESM3 [file 16781004]

| Όνομα | ΗμερομηνίαΓέννησης | Ημερομηνία Συμπλήρωσης |
| --- | --- | --- |
|  |  |  |

Μερικοί νέοι μας λένε ότι είναι ευχαριστημένοι με την ακοή, την εμφάνιση και την ομιλία τους ενώ μερικοί άλλοι αισθάνονται λιγότερο ευτυχισμένοι μερικές φορές.

Πώς αισθάνεστε για την ακοή σας, την εμφάνιση και την ομιλία σας;

Δεν υπάρχουν σωστές ή λανθασμένες απαντήσεις.

Παρακαλώ επιλέξτε ένα κουτί για κάθε απάντηση

**Πόσο ευχαριστημένος/η είσαι με:**

**1. Το πώς φαίνεται (ή μοιάζει) το πρόσωπό σου:**

Πολύ ☺ ☹ Καθόλου

Ευχαριστημένος/η Ευχαριστημένος/η

10 0

**2. Τη συνολική σου εμφάνιση:**

Πολύ ☺ ☹ Καθόλου

Ευχαριστημένος/η Ευχαριστημένος/η

10 0

**3. Την πλάγια όψη / προφίλ:**

Πολύ ☺ ☹ Καθόλου

Ευχαριστημένος/η Ευχαριστημένος/η

10 0

**4. Πόσο όμορφος/η νομίζεις ότι είσαι;**

Πολύ ☺ ☹ Καθόλου

Όμορφος/η Όμορφος/η

10 0

**Πώς αισθάνεσαι με τα συγκεκριμένα μέρη του προσώπου σου;**

**5. Μύτη:**

Πολύ ☺ ☹ Καθόλου

Ευχαριστημένος/η Ευχαριστημένος/η

10 0

**6. Χείλη:**

Πολύ ☺ ☹ Καθόλου

Ευχαριστημένος/η Ευχαριστημένος/η

10 0

**7. Πηγούνι:**

Πολύ ☺ ☹ Καθόλου

Ευχαριστημένος/η Ευχαριστημένος/η

10 0

**8. Δόντια:**

Πολύ ☺ ☹ Καθόλου

Ευχαριστημένος/η Ευχαριστημένος/η

10 0

**9. Μάγουλα:**

Πολύ ☺ ☹ Καθόλου

Ευχαριστημένος/η Ευχαριστημένος/η

10 0

**10. Μαλλιά:**

Πολύ ☺ ☹ Καθόλου

Ευχαριστημένος/η Ευχαριστημένος/η

10 0

**11. Αυτιά:**

Πολύ ☺ ☹ Καθόλου

Ευχαριστημένος/η Ευχαριστημένος/η

10 0

**12. Μάτια:**

Πολύ ☺ ☹ Καθόλου

Ευχαριστημένος/η Ευχαριστημένος/η

10 0

###### **13. Πόσο ευχαριστημένος/η είσαι με την ομιλία σου;**

Πολύ ☺ ☹ Καθόλου

Ευχαριστημένος/η Ευχαριστημένος/η

10 0

###### **14. Πόσο ευχαριστημένος/η είσαι με την ακοή σου;**

Πολύ ☺ ☹ Καθόλου

Ευχαριστημένος/η Ευχαριστημένος/η

10 0

###### **15. Γενικότερα, πόσο αξιοπρόσεκτη νομίζεις ότι είναι η σχισμή (ή σχιστία) σου σε άλλους ανθρώπους;**

Καθόλου ☺ ☹ Πολύ

Αξιοπρόσεκτη Αξιοπρόσεκτη

10 0
